# Supplementary material
Source: PubMed Central journal article supplement (PMC3232929)
Supplement: supp_31.23.4720_MCB6147-11_SF1.pdf [file supp_31.23.4720_MCB6147-11_SF1.pdf]

**Figure S1**

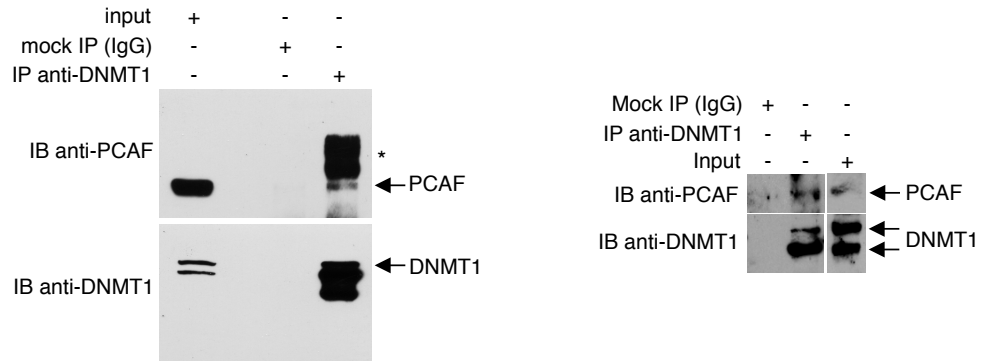

Figure S1. PCAF interacts with DNMT1. Mock precipitates (IgG control) and anti-DNMT1 immunoprecipitates from 293T nuclear extracts were immunoblotted with anti-PCAF or anti-DNMT1 antibody. Results from two separate experiments are shown. \*indicate non-specific bands on Western blots.
