# Supplementary material
Source: PubMed Central journal article supplement (PMC3232929)
Supplement: supp_31.23.4720_MCB6147-11_SF2.pdf [file supp_31.23.4720_MCB6147-11_SF2.pdf]

**Figure S2**

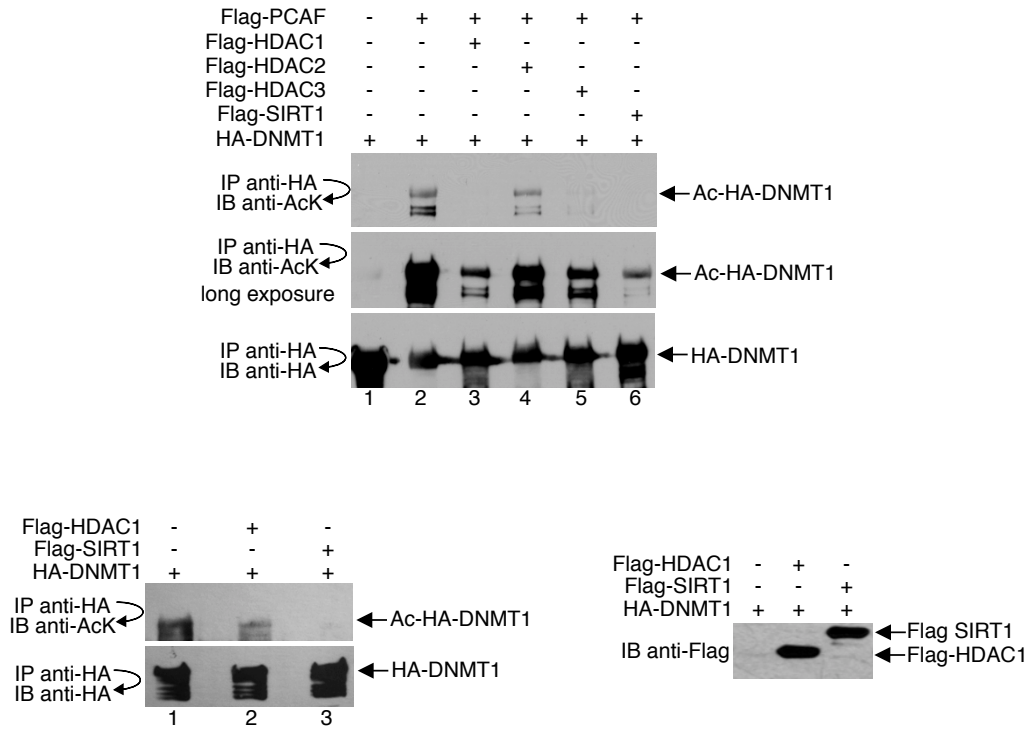

Figure S2. SIRT1 deacetylates DNMT1. 293T cells were transfected with HA-DNMT1, Flag-PCAF, and Flag-tagged HDACs as indicated. Cell lysates were immunoprecipitated with antibody to HA, and immunoprecipitates were immunoblotted (IB) with antibody to acetyl-lysine. The membranes were stripped and re-probed with anti-HA. A separate western blot was performed with anti-Flag antibody to assess Flag-HDAC1 and Flag-SIRT1 expressions (*bottom right*).
