# Supplementary material
Source: PubMed Central journal article supplement (PMC3232929)
Supplement: supp_31.23.4720_MCB6147-11_SF3.pdf [file supp_31.23.4720_MCB6147-11_SF3.pdf]

Figure S3

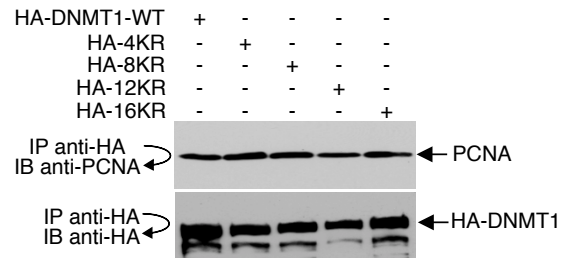

Figure S3. DNMT1 acetylation-mutations do not affect DNMT1-PCNA interaction. 293T cells were transfected with HA-DNMT1 or various HA-tagged DNMT1 mutants. Anti-HA immunoprecipitates were immunoblotted with anti-PCNA or anti-HA.
