# Supplementary material
Source: PubMed Central journal article supplement (PMC3232929)
Supplement: supp_31.23.4720_MCB6147-11_ST1.pdf [file supp_31.23.4720_MCB6147-11_ST1.pdf]

**Table S1. Densitometric quantitation of DNMT1 Deacetylation by HDACs****Western blot results from Figure 2C**

| lane |         | anti-HA | anti-Ack | anti-Ack/anti-HA | normalized to control (lane 1) |
|------|---------|---------|----------|------------------|--------------------------------|
| 2    | control | 7.27    | 19.91    | 2.74             | 1.00                           |
| 4    | no PCAF | 21.90   | 0.03     | 0.00             | 0.00                           |
| 6    | HDAC1   | 8.76    | 4.65     | 0.53             | 0.19                           |
| 8    | HDAC2   | 8.98    | 18.99    | 2.11             | 0.77                           |
| 10   | HDAC3   | 11.76   | 6.70     | 0.57             | 0.21                           |
| 12   | SIRT1   | 16.87   | 0.10     | 0.01             | 0.00                           |
| 14   | SIRT6   | 10.97   | 21.98    | 2.00             | 0.73                           |
| 16   | SIRT7   | 13.49   | 27.66    | 2.05             | 0.75                           |

**Western blot results from Figure S3**

| lane |         | anti-HA | anti-Ack | anti-Ack/anti-HA | normalized to control (lane 2) |
|------|---------|---------|----------|------------------|--------------------------------|
| 1    | no PCAF | 24.10   | 0.41     | 0.02             | 0.00                           |
| 2    | control | 9.34    | 35.72    | 3.82             | 1.00                           |
| 3    | HDAC1   | 17.31   | 11.01    | 0.64             | 0.17                           |
| 4    | HDAC2   | 9.54    | 28.41    | 2.98             | 0.78                           |
| 5    | HDAC3   | 17.70   | 19.83    | 1.12             | 0.29                           |
| 6    | SIRT1   | 22.00   | 4.62     | 0.21             | 0.05                           |

| lane |         | anti-HA | anti-Ack | anti-Ack/anti-HA | normalized to control (lane 1) |
|------|---------|---------|----------|------------------|--------------------------------|
| 1    | control | 30.03   | 67.95    | 2.26             | 1.00                           |
| 2    | HDAC1   | 31.95   | 31.35    | 0.98             | 0.43                           |
| 3    | SIRT1   | 38.02   | 0.70     | 0.02             | 0.01                           |
